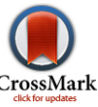

## Correction

# Correction: Infective Endocarditis Epidemiology Over Five Decades: A Systematic Review

**The PLOS ONE Staff**

There is an error in the first sentence of the second paragraph of the “Hospital-based Studies” subsection of the Results. The correct sentence is: Changes in microbiology percentage over time are summarized in Figure 3 and shown in Figure 4 for individual organisms.

**Reference**

1. Slipczuk L, Codolosa JN, Davila CD, Romero-Corral A, Yun J, et al. (2013) Infective Endocarditis Epidemiology Over Five Decades: A Systematic Review. PLoS ONE 8(12): e82665. doi:10.1371/journal.pone.0082665

**Citation:** The PLOS ONE Staff (2014) Correction: Infective Endocarditis Epidemiology Over Five Decades: A Systematic Review. PLoS ONE 9(10): e111564. doi:10.1371/journal.pone.0111564

**Published:** October 15, 2014

**Copyright:** © 2014 The PLOS ONE Staff. This is an open-access article distributed under the terms of the Creative Commons Attribution License, which permits unrestricted use, distribution, and reproduction in any medium, provided the original author and source are credited.
